# Supplementary material
Source: PubMed Central journal article supplement (PMC5119565)
Supplement: PRO-25-2209-s004.pdf [file PRO-25-2209-s004.pdf]

| sequence | apo         |              | NECA        |              |
|----------|-------------|--------------|-------------|--------------|
|          | $\delta$ 1H | $\delta$ 15N | $\delta$ 1H | $\delta$ 15N |
| K72      |             |              |             |              |
| S73      |             |              | 8.28685     | 118.26973    |
| E74      | 8.2432      | 124.46792    | 8.2286      | 124.5182     |
| K75      | 7.69332     | 122.37042    | 7.64787     | 122.30398    |
| F76      |             | 121.46707    | 8.44581     | 121.32761    |
| A77      |             |              | 8.07164     | 122.6628     |
| F78      |             |              | 8.01501     | 119.30547    |
| Q79      |             |              |             |              |
| A80      |             |              | 8.94193     | 127.64673    |
| E81      |             |              | 9.3142      | 117.15046    |
| V82      |             |              | 7.1249      | 120.25549    |
| N83      |             |              |             |              |
| R84      |             |              |             |              |
| M85      |             |              |             |              |
| M86      |             |              |             |              |
| K87      |             |              |             |              |
| L88      |             |              |             |              |
| I89      |             |              |             |              |
| I90      |             |              |             |              |
| N91      |             |              |             |              |
| S92      |             |              |             |              |
| L93      |             |              |             |              |
| Y94      |             |              |             |              |
| K95      |             |              |             |              |
| N96      |             |              |             |              |
| K97      |             |              |             |              |
| E98      |             |              | 8.56022     | 114.8418     |
| I99      | 7.21291     | 116.3302     | 7.14113     | 116.07985    |
| F100     | 7.92526     | 121.80935    | 7.77636     | 121.3771     |
| L101     | 5.8338      | 122.87614    | 5.64003     | 122.2809     |
| R102     | 6.02147     | 120.30118    | 6.12016     | 120.09997    |
| E103     | 7.49137     | 116.51531    | 7.37985     | 116.41552    |
| L104     | 7.84526     | 118.97464    | 7.80616     | 117.73273    |
| I105     | 8.04157     | 121.49794    | 8.07647     | 121.11866    |
| S106     | 8.28218     | 117.84688    | 8.2381      | 117.7332     |
| N107     | 8.0563      | 119.98244    | 7.8201      | 119.11998    |
| A108     | 7.63558     | 124.82367    | 7.70943     | 125.5112     |
| S109     | 8.20124     | 112.37093    | 8.16814     | 112.45664    |
| D110     | 7.98603     | 119.79577    | 7.95185     | 119.74694    |
| A111     | 7.63664     | 123.47623    | 7.42231     | 123.66649    |
| L112     | 8.05974     | 123.85314    | 8.02645     | 124.47292    |

|      |         |           |          |           |
|------|---------|-----------|----------|-----------|
| D113 | 8.58224 | 121.58261 | 8.51447  | 121.40142 |
| K114 | 7.79115 | 117.46488 | 7.81656  | 117.80074 |
| I115 | 7.18911 | 117.20607 | 7.20775  | 117.24601 |
| R116 | 8.2964  | 126.97224 | 8.26274  | 126.69329 |
| L117 | 8.1847  | 120.83782 | 8.20536  | 121.05115 |
| I118 | 7.74519 | 122.2545  | 7.8205   | 122.38914 |
| S119 | 8.23441 | 116.6614  | 8.21576  | 116.7293  |
| L120 | 7.30957 | 121.20597 | 7.31404  | 121.22008 |
| T121 | 7.26905 | 106.15215 | 7.26957  | 106.16167 |
| D122 | 7.53835 | 122.33645 | 7.53682  | 122.32699 |
| E123 | 8.99483 | 125.93829 | 8.99754  | 125.92213 |
| N124 | 8.34364 | 117.50031 | 8.34514  | 117.49313 |
| A125 | 7.37822 | 123.8367  | 7.39783  | 123.82905 |
| L126 | 8.02728 | 114.54043 | 8.05131  | 114.47898 |
| A127 | 7.0768  | 122.32215 | 7.06774  | 122.36211 |
| G128 | 8.57471 | 108.26059 | 8.58436  | 108.07876 |
| N129 | 7.66125 | 116.53572 | 7.63602  | 116.35467 |
| E130 | 8.92029 | 126.15699 | 8.94612  | 126.38687 |
| E131 | 7.67698 | 118.31537 | 7.6691   | 118.34281 |
| L132 | 8.29771 | 127.42584 | 8.29115  | 127.27229 |
| T133 | 7.76895 | 112.08374 | 7.83376  | 112.16291 |
| V134 | 8.04027 | 118.68307 | 8.03262  | 118.64601 |
| K135 | 9.28328 | 127.85412 | 9.35214  | 127.92795 |
| I136 | 9.25658 | 127.84362 | 9.27437  | 127.9702  |
| K137 | 9.08865 | 129.19768 | 9.05214  | 129.10446 |
| C138 | 9.37138 | 126.10356 | 9.36356  | 126.1204  |
| D139 | 9.11347 | 126.67293 | 9.1076   | 126.68759 |
| K140 | 8.70831 | 125.76306 | 8.69992  | 125.68623 |
| E141 | 8.45639 | 118.4661  | 8.44421  | 118.46839 |
| K142 | 7.03332 | 115.69923 | 7.0377   | 115.6608  |
| N143 | 7.73065 | 118.39766 | 7.72538  | 118.45715 |
| L144 | 7.33254 | 112.60012 | 7.33559  | 112.62381 |
| L145 | 7.93031 | 122.70734 | 7.88645  | 122.74618 |
| H146 | 8.92414 | 124.30144 | 8.91352  | 124.28628 |
| V147 | 9.34602 | 122.84485 | 9.3803   | 122.93335 |
| T148 | 9.19915 | 127.21124 | 9.19946  | 127.14089 |
| D149 | 9.91996 | 128.10054 | 9.99162  | 128.62112 |
| T150 | 7.39749 | 112.37889 | 7.3785   | 111.99969 |
| G151 | 9.68325 | 111.3235  | 10.15084 | 112.114   |
| V152 | 6.73753 | 116.4527  | 6.72631  | 116.56843 |
| G153 | 7.48071 | 104.70225 | 7.98798  | 104.90704 |
| M154 | 7.97912 | 117.11395 | 8.03185  | 117.06987 |
| T155 | 8.17476 | 114.31647 | 8.10991  | 113.96512 |

|      |         |           |         |           |
|------|---------|-----------|---------|-----------|
| R156 | 8.9741  | 121.45622 | 8.99264 | 121.32818 |
| E157 | 7.8239  | 115.71636 | 7.73336 | 115.53126 |
| E158 | 7.20968 | 119.30113 | 7.20617 | 119.42288 |
| L159 | 8.11168 | 121.34654 | 8.1686  | 121.61623 |
| V160 |         |           | 6.9614  | 113.84794 |
| K161 | 7.80038 | 118.07309 | 8.02306 | 117.56702 |
| N162 |         |           | 9.20317 | 118.94016 |
| L163 |         |           |         |           |
| G164 |         |           |         |           |
| T165 |         |           |         |           |
| I166 |         |           |         |           |
| A167 |         |           |         |           |
| K168 |         |           |         |           |
| S169 |         |           |         |           |
| G170 |         |           |         |           |
| T171 |         |           |         |           |
| S172 |         |           |         |           |
| E173 |         |           |         |           |
| F174 |         |           | 7.70883 | 121.15459 |
| L175 |         |           | 8.07125 | 119.18065 |
| N176 |         |           | 7.86895 | 119.30529 |
| K177 | 7.7595  | 121.2029  | 7.92118 | 121.0817  |
| M178 |         |           | 8.03156 | 119.16506 |
| T179 |         |           | 7.68068 | 115.84641 |
| E180 |         |           | 7.69552 | 122.0488  |
| A181 |         |           | 7.63696 | 121.87607 |
| Q182 | 7.78618 | 118.24292 | 7.70579 | 117.84272 |
| E183 |         |           | 8.11795 | 120.19969 |
| D184 | 7.97904 | 119.93673 | 7.93161 | 119.50059 |
| G185 | 8.16403 | 110.6878  | 8.18229 | 111.07123 |
| Q186 | 8.16469 | 120.81023 | 8.19563 | 120.83051 |
| S187 | 8.34513 | 116.6158  | 8.32993 | 116.37569 |
| T188 |         |           |         |           |
| S189 |         |           |         |           |
| E190 |         |           |         |           |
| L191 |         |           |         |           |
| I192 |         |           | 7.73624 | 115.35525 |
| G193 |         |           | 7.67378 | 108.13234 |
| Q194 |         |           | 7.85489 | 122.02948 |
| F195 |         |           | 7.71063 | 121.27562 |
| G196 |         |           |         |           |
| V197 |         |           | 7.33519 | 108.88804 |
| G198 | 8.6003  | 109.79881 | 8.59704 | 110.05595 |

|      |          |           |          |           |
|------|----------|-----------|----------|-----------|
| F199 |          |           | 9.63224  | 125.51729 |
| Y200 |          |           | 7.16712  | 112.08727 |
| S201 |          |           | 8.09404  | 114.54903 |
| A202 | 7.84991  | 125.7268  | 7.87997  | 125.96326 |
| F203 |          |           | 7.13097  | 112.24987 |
| L204 |          |           |          |           |
| V205 | 6.52072  | 103.48412 | 6.52467  | 104.04129 |
| A206 | 7.23211  | 124.32052 | 7.26893  | 124.36452 |
| D207 | 8.2307   | 120.61514 | 8.18118  | 120.90219 |
| K208 | 7.20713  | 117.05165 | 7.2104   | 116.81443 |
| V209 | 8.63028  | 125.06709 | 8.678    | 124.96354 |
| I210 | 9.12325  | 128.11062 | 9.18479  | 128.3563  |
| V211 | 10.53761 | 131.30596 | 10.59041 | 131.4558  |
| T212 | 9.12809  | 126.40827 | 9.06017  | 126.54822 |
| S213 | 9.04088  | 119.09651 | 9.03278  | 119.26971 |
| K214 |          |           |          |           |
| H215 |          |           |          |           |
| N216 |          |           |          |           |
| N217 |          |           |          |           |
| D218 |          |           |          |           |
| T219 |          |           |          |           |
| Q220 |          |           |          |           |
| H221 |          |           |          |           |
| I222 | 9.21107  | 118.61699 | 9.209    | 118.64859 |
| W223 | 10.12397 | 133.96557 | 10.08531 | 133.94765 |
| E224 |          |           | 8.51242  | 127.16398 |
| S225 |          |           | 8.5058   | 114.91401 |
| D226 | 8.0876   | 127.13304 | 8.039    | 127.39097 |
| S227 |          |           |          |           |
| N228 |          |           |          |           |
| E229 |          |           | 8.29187  | 118.38139 |
| F230 |          |           | 8.75199  | 120.06738 |
| S231 | 8.36399  | 113.62816 | 8.29702  | 113.33092 |
| V232 | 8.70965  | 119.94682 | 8.76798  | 120.14373 |
| I233 | 8.80346  | 123.15536 | 8.80863  | 122.9651  |
| A234 | 8.48166  | 127.48774 | 8.45937  | 127.42103 |
| D235 | 8.03539  | 124.57173 | 7.99192  | 124.33104 |
| P236 |          |           |          |           |
| R237 | 8.63847  | 118.4619  | 8.63178  | 118.48683 |
| G238 | 7.5463   | 107.48357 | 7.51919  | 107.37765 |
| N239 | 7.83643  | 117.26531 | 7.83006  | 117.27574 |
| T240 | 8.24779  | 117.02775 | 8.24469  | 116.84734 |
| L241 | 8.82127  | 124.94714 | 8.82361  | 124.93573 |

|      |         |           |         |           |
|------|---------|-----------|---------|-----------|
| G242 | 8.12059 | 111.47386 | 8.11073 | 111.42808 |
| R243 | 7.74519 | 122.00638 | 7.81555 | 122.24195 |
| G244 | 9.14277 | 117.10606 | 9.19048 | 117.2518  |
| T245 | 7.80841 | 115.79921 | 7.73543 | 115.21505 |
| T246 | 9.48515 | 123.05618 | 9.53549 | 123.4358  |
| I247 | 9.13909 | 130.05725 | 9.18381 | 129.89685 |
| T248 | 9.77669 | 126.9284  | 9.84085 | 126.96033 |
| L249 | 9.31779 | 127.2847  | 9.34308 | 127.53602 |
| V250 | 7.98718 | 124.24337 | 7.97456 | 124.40961 |
| L251 | 7.3883  | 126.639   | 7.36094 | 126.50145 |
| K252 | 8.43245 | 120.91388 | 8.44064 | 121.16184 |
| E253 | 9.03958 | 127.0488  | 9.0245  | 127.02849 |
| E254 | 8.78983 | 114.70446 | 8.77867 | 114.64323 |
| A255 | 7.72199 | 125.41202 | 7.69994 | 125.47745 |
| S256 | 7.18519 | 114.21879 | 7.19034 | 114.16772 |
| D257 | 8.71917 | 123.99841 | 8.74113 | 124.009   |
| Y258 | 7.45557 | 114.79835 | 7.47292 | 114.80991 |
| L259 | 7.12385 | 111.95206 | 7.13581 | 112.10597 |
| E260 | 7.23236 | 117.79461 | 7.23912 | 117.91134 |
| L261 | 8.51034 | 127.54656 | 8.52137 | 127.33667 |
| D262 | 8.91829 | 117.22742 | 8.91411 | 117.2536  |
| T263 | 7.02761 | 117.3713  | 7.02362 | 117.32906 |
| I264 | 8.03393 | 122.42836 | 8.01619 | 122.39079 |
| K265 | 8.83013 | 120.0799  | 8.84428 | 120.08899 |
| N266 | 7.53912 | 116.25655 | 7.53688 | 116.22523 |
| L267 | 7.87611 | 121.10939 | 7.85449 | 120.99908 |
| V268 | 8.68064 | 119.31502 | 8.66423 | 119.23976 |
| R269 | 8.09911 | 119.7846  | 8.12631 | 120.07878 |
| K270 | 7.31477 | 119.19586 | 7.30959 | 119.02488 |
| Y271 | 7.56234 | 115.25489 | 7.55721 | 115.13513 |
| S272 | 7.70459 | 114.65629 | 7.70617 | 114.43202 |
| Q273 | 7.61594 | 120.52262 | 7.5516  | 120.59142 |
| F274 | 8.03359 | 116.12162 | 8.04584 | 115.93858 |
| I275 | 7.24441 | 119.76089 | 7.19355 | 119.97437 |
| N276 | 8.74058 | 125.86346 | 8.76115 | 125.98877 |
| F277 | 6.74892 | 117.47997 | 6.75276 | 117.42954 |
| P278 |         |           |         |           |
| I279 | 8.02529 | 122.19872 | 7.99108 | 122.22449 |
| Y280 | 9.0189  | 124.32237 | 9.01282 | 124.27326 |
| V281 | 8.99132 | 119.96279 | 8.99221 | 119.92859 |
| W282 | 8.8133  | 132.22322 | 8.80224 | 132.21531 |
| S283 | 8.36981 | 123.45277 | 8.36844 | 123.46045 |
| S284 | 6.32888 | 115.99738 | 6.30903 | 115.99336 |

|      |         |           |         |           |
|------|---------|-----------|---------|-----------|
| K285 | 8.231   | 120.4823  | 8.23004 | 120.43204 |
| T286 | 8.30904 | 118.15888 | 8.30626 | 118.1653  |
| G287 | 8.51518 | 115.69212 | 8.51471 | 115.678   |
| G288 |         |           |         |           |
| G289 |         |           | 6.8111  | 104.98035 |
| G290 | 8.01256 | 107.76477 | 8.01186 | 107.73507 |
| K291 | 7.24573 | 121.09084 | 7.23999 | 121.07528 |
| T292 | 8.55954 | 121.73926 | 8.5555  | 121.74438 |
| V293 | 8.52943 | 125.9764  | 8.52847 | 125.94522 |
| W294 | 8.21514 | 125.52748 | 8.20851 | 125.50724 |
| D295 | 7.95501 | 118.77749 | 7.95576 | 118.7001  |
| W296 | 8.82955 | 123.1057  | 8.82822 | 123.0654  |
| E297 | 9.37007 | 129.42506 | 9.37088 | 129.35637 |
| L298 | 8.87184 | 131.6902  | 8.8747  | 131.70641 |
| M299 | 9.08403 | 125.32505 | 9.09462 | 125.26952 |
| N300 | 7.73242 | 127.0236  | 7.71915 | 126.98185 |
